# Supplementary material for: Utilization Trend and Comparison of Different Radiotherapy Modes for Patients with Early-Stage High-Intermediate-Risk Endometrial Cancer: A Real-World, Multi-Institutional Study
Source: MDPI journal article supplement (doi:10.3390/cancers14205129), 2022-10-19
Supplement: s1 [file s1]

# Supplementary Materials: Utilization Trend and Comparison of Different Radiotherapy Modes for Patients with Early-Stage High–Intermediate-Risk Endometrial Cancer: A Real-World, Multi-Institutional Study

Kang Ren, Lijuan Zou, Tiejun Wang, Zi Liu, Jianli He, Xiaoge Sun, Wei Zhong, Fengju Zhao, Xiaomei Li, Sha Li, Hong Zhu, Zhanshu Ma, Shuai Sun, Wenhui Wang, Ke Hu, Xiaorong Hou, Lichun Wei and Fuquan Zhang

Table S1. Subgroup analyses in GOG249 HIR group

|                                     |     |         | Before matching |              |              |              | After matching |              |        |              |
|-------------------------------------|-----|---------|-----------------|--------------|--------------|--------------|----------------|--------------|--------|--------------|
|                                     |     |         | OS              | DFS          | DMFS         | LRF<br>S     | OS             | DFS          | DMFS   | LRFS         |
| GOG-249                             | cN0 | VB      | 85.40%          | 62.30%       | 71.50%       | 72.80%       | 72.80%         | 62.30%       | 71.50% | 72.80%       |
|                                     |     | EBRT±VB | 91.60%          | 87.40%       | 87.40%       | 92.10%       | 96.20%         | 93.00%       | 93.00% | 96.20%       |
|                                     |     | P       | 0.236           | <b>0.012</b> | <b>0.036</b> | <b>0.014</b> | 0.194          | <b>0.049</b> | 0.084  | <b>0.044</b> |
|                                     | pN0 | VB      | 95.70%          | 91.60%       | 93.40%       | 94.50%       | 95.70%         | 93.50%       | 93.40% | 94.50%       |
|                                     |     | EBRT±VB | 91.20%          | 87.40%       | 87.80%       | 92.00%       | 90.10%         | 81.60%       | 82.60% | 89.40%       |
|                                     |     | P       | 0.626           | 0.548        | 0.329        | 0.92         | 0.617          | 0.192        | 0.108  | 0.869        |
| Exclude FIGO II from GOG-249 cohort | cN0 | VB      | 85.40%          | 62.30%       | 71.50%       | 72.80%       | 85.40%         | 62.30%       | 71.50% | 72.80%       |
|                                     |     | EBRT±VB | 89.50%          | 88.10%       | 88.10%       | 90.10%       | 86.10%         | 86.30%       | 86.20% | 90.90%       |
|                                     |     | P       | 0.431           | <b>0.025</b> | 0.057        | 0.057        | 0.847          | 0.103        | 0.174  | 0.128        |
|                                     | pN0 | VB      | 95.60%          | 93.40%       | 95.20%       | 94.40%       | 95.60%         | 93.40%       | 95.20% | 94.30%       |
|                                     |     | EBRT±VB | 90.90%          | 90.60%       | 90.50%       | 93.00%       | 89.50%         | 90.70%       | 90.60% | 92.10%       |
|                                     |     | P       | 0.665           | 0.896        | 0.55         | 0.779        | 0.678          | 0.928        | 0.681  | 0.714        |

**Table S2.** Acute toxicities for patients treated with EBRT±VBT and V

|                      | Whole patients(N=1038)   |                        |        | GOG-249 HIR(N=473)           |                              |        | PORTEC-2 HIR(N=184)         |                        |        | ESMO-ESGO-ESTRO HIR(N=207) |              |        |
|----------------------|--------------------------|------------------------|--------|------------------------------|------------------------------|--------|-----------------------------|------------------------|--------|----------------------------|--------------|--------|
|                      | EBRT±VBT                 | VBT                    | P      | EBRT±VBT<br>T                | VBT                          | P      | EBRT±VBT                    | VBT                    | P      | EBRT±VBT                   | VBT          | P      |
| <b>Hematological</b> |                          |                        |        |                              |                              |        |                             |                        |        |                            |              |        |
| 0                    | 317(55.1%)               | 435(94.0%)             | <0.001 | 178<br>( 54.8%)              | 136<br>( 91.9%)              | <0.001 | 61(68.5%)                   | 89(93.7%)              | <0.001 | 55 ( 57.3%)                | 94 ( 90.4%)  | <0.001 |
| 1–2                  | 231 (40.2%)              | 28(6.0%)               |        | 134<br>( 41.2%)              | 12 ( 8.1%)                   |        | 28(31.5%)                   | 6(6.3%)                |        | 38 ( 39.6%)                | 10 ( 9.6%)   |        |
| 3–4                  | 27(4.7%)                 | 0(0)                   |        | 13 ( 4.0%)                   | 0 ( 0.0%)                    |        |                             |                        |        | 3 ( 3.1%)                  | 0 ( 0)       |        |
| <b>Upper GI</b>      |                          |                        |        |                              |                              |        |                             |                        |        |                            |              |        |
| 0                    | 334 (58.1%)              | 420(90.7%)             | <0.001 | 190 <sub>a</sub><br>( 58.5%) | 130<br>( 87.8%)              | <0.001 | 190(58.5%)                  | 130 <sub>(87.8%)</sub> | <0.001 | 53 ( 55.2%)                | 89 ( 85.6%)  | <0.001 |
| 1–2                  | 239(41.6%)               | 43(9.3%)               |        | 134<br>( 41.2%)              | 18 ( 12.2%)                  |        | 134(41.2%)                  | 18(12.2%)              |        | 43(44.8%)                  | 15(14.4%)    |        |
| 3                    | 2(0.3%)                  | 0(0%)                  |        | 1 ( 0.3%)                    | 0 <sub>a</sub> ( 0.0%)       |        | 1(0.3%)                     | 0(0)                   |        | 0                          | 0            |        |
| <b>Lower GI</b>      |                          |                        |        |                              |                              |        |                             |                        |        |                            |              |        |
| 0                    | 185 <sub>a</sub> (32.2%) | 377<br>(81.4%)         | <0.001 | 115<br>( 35.4%)              | 117 <sub>b</sub><br>( 79.1%) | <0.001 | 34<br>( 38.2%)              | 81<br>( 85.3%)         | <0.001 | 30 ( 31.3%)                | 75 ( 72.1%)  | <0.001 |
| 1–2                  | 386 (67.1%)              | 86 (18.6%)             |        | 206<br>( 63.4%)              | 31 ( 20.9%)                  |        | 54<br>( 60.7%)              | 14<br>( 14.7%)         |        | 66 ( 68.8%)                | 29 ( 27.9%)  |        |
| 3                    | 4 ( 0.7%)                | 0 <sub>a</sub> ( 0.0%) |        | 4 ( 1.2%)                    | 0 ( 0.0%)                    |        | 1 ( 1.1%)                   | 0 ( 0%)                |        |                            |              |        |
| <b>Urinary Tract</b> |                          |                        |        |                              |                              |        |                             |                        |        |                            |              |        |
| 0                    | 464 (51.4%)              | 438<br>(48.6%)         | <0.001 | 274 <sub>a</sub><br>( 84.3%) | 137<br>( 92.6%)              | 0.044  | 70 <sub>a</sub><br>( 78.7%) | 90<br>( 94.7%)         | 0.0047 | 75 ( 78.1%)                | 100 ( 96.2%) | <0.001 |
| 1–2                  | 110 (81.5%)              | 25 (18.5%)             |        | 50<br>( 15.4%)               | 11 ( 7.4%)                   |        | 17<br>( 19.1%)              | 4 ( 4.2%)              |        | 21 ( 21.8%)                | 4 ( 3.8%)    |        |
| 3                    | 1 (100.0%)               | 0 (0.0%)               |        | 1 ( 0.3%)                    | 0 ( 0.0%)                    |        | 2 ( 2.2%)                   | 1 ( 1.1%)              |        |                            |              |        |

Note: GI gastrointestinal, EBRT External Beam Radiation, VBT Vaginal Brachytherapy.
